1 **Allogeneic CAR-invariant Natural Killer T Cells Exert Potent Antitumor Effects Through Host**  
2 **CD8 T Cell Cross-Priming**

3

4 Federico Simonetta<sup>1,2</sup>, Juliane K. Lohmeyer<sup>1</sup>, Toshihito Hirai<sup>1</sup>, Kristina Maas-Bauer<sup>1</sup>, Maite Alvarez<sup>1</sup>,  
5 Arielle S. Wenokur<sup>1</sup>, Jeanette Baker<sup>1</sup>, Amin Aalipour<sup>3,4</sup>, Xuhuai Ji<sup>5</sup>, Samuel Haile<sup>6</sup>, Crystal L. Mackall<sup>6,7,8</sup>  
6 and Robert S. Negrin<sup>1\*</sup>

7

8 <sup>1</sup> Division of Blood and Marrow Transplantation, Department of Medicine, Stanford University School of  
9 Medicine, Stanford, CA 94305, USA

10 <sup>2</sup> Division of Hematology, Department of Oncology, Geneva University Hospitals and Translational  
11 Research Centre in Onco-Haematology, Faculty of Medicine, University of Geneva, Geneva, Switzerland

12 <sup>3</sup> Department of Bioengineering, Stanford University School of Medicine, Stanford, CA, USA

13 <sup>4</sup> Molecular Imaging Program at Stanford, Stanford University School of Medicine, Stanford, CA, USA

14 <sup>5</sup> Human Immune Monitoring Center, Stanford University School of Medicine, Stanford, CA, USA.

15 <sup>6</sup> Department of Pediatrics, Stanford University, Stanford, CA, USA

16 <sup>7</sup> Stanford Cancer Institute, Stanford University, Stanford, CA, USA

17 <sup>8</sup> Parker Institute for Cancer Immunotherapy, San Francisco, CA, USA

18

19 Running title: Allogeneic CAR iNKT cells elicit host CD8 T cells

20

21 Key words: Chimeric Antigen Receptor, invariant Natural Killer T cells, immunoadjuvant, allogeneic  
22 cellular therapy, off-the-shelf

23

24 \*To whom correspondence should be addressed: Professor Robert S. Negrin, MD, Division of Blood and  
25 Marrow Transplantation, Department of Medicine, Stanford University School of Medicine, Center for  
26 Clinical Sciences Research Building, 269 W. Campus Drive, Stanford, CA 94305 (USA), E-Mail:  
27 negrs@stanford.edu

28

29

30 **Abstract**

31

32 The development of allogeneic chimeric antigen receptor (CAR) T cell therapies for off-the-shelf use is a  
33 major goal yet faces two main immunological challenges, namely the risk of graft-versus-host-disease  
34 (GvHD) induction by the transferred cells and the rejection by the host immune system limiting their  
35 persistence. We demonstrate that allogeneic CAR-engineered invariant natural killer T (iNKT) cells, a  
36 cell population without GvHD-induction potential that displays immunomodulatory properties, exerted  
37 potent direct and indirect antitumor activity in murine models of B-cell lymphoma when administered  
38 across major MHC-barriers. In addition to their known direct cytotoxic effect, allogeneic CAR iNKT cells  
39 induced tumor-specific antitumor immunity through host CD8 T cell cross-priming, resulting in a potent  
40 antitumor effect lasting longer than the physical persistence of the allogeneic cells. The utilization of off-  
41 the-shelf allogeneic CAR iNKT cells could meet significant unmet needs in the clinic.

42

## 43 **Introduction**

44

45 Chimeric antigen receptor (CAR) T cells have resulted in dramatic and effective therapy for a range of  
46 relapsed and refractory malignancies. The use of autologous cells for the generation of CAR T cells  
47 represents a significant limitation to their widespread use for a number of significant reasons, including  
48 the impact of disease and treatment on the T cell product, costs of individual production, and the time  
49 required to produce the cellular product for patients with often rapidly progressive disease. The  
50 development of universal allogeneic CAR T cells could address these challenges yet faces two major  
51 limitations, namely the risk of graft-versus-host-disease (GvHD) induction by the allogeneic cells that  
52 recognize host tissues and the rejection of the CAR modified cells by the host immune system. Ablation  
53 of the T-cell receptor (TCR) (1–4) or use of non-MHC-restricted innate lymphocytes have been attempted  
54 to prevent GvHD. Similarly, ablation of MHC-class-I molecules to limit rejection by the host immune-  
55 system (5) has been employed in preclinical models.

56

57 Invariant Natural Killer T (iNKT) cells are a rare subset of innate lymphocytes representing less than 1%  
58 of the total lymphocyte population both in humans and mice. iNKT cells express a semi-invariant TCR  
59 recognizing glycolipids presented in the context of the monomorphic, MHC-like molecule CD1d.  
60 Because of their peculiar TCR constitution and antigen recognition modality, iNKT cells do not display  
61 any GvHD induction potential and can even prevent GvHD (reviewed in (6)). iNKT cells display potent  
62 direct antitumor activity through production of cytotoxic molecules(7). Several groups successfully  
63 generated human CAR iNKT cells provided with antitumor potential as assessed *in vitro* and in  
64 xenogeneic murine models(8–12). These studies revealed several advantages of using CAR iNKT cells  
65 over conventional CAR T cells, including their lack of induction of xeno-GvHD(8), their preferential  
66 migration to tumor sites (8) and their capacity of CAR iNKT to target both the natural ligand CD1d and  
67 the CAR-targeted antigen (11). In addition to their direct cytotoxic effect, iNKT cells are known for their  
68 strong immunomodulatory effect. In particular, iNKT cells induce CD8 T cell cross-priming(13, 14)  
69 through the licensing of CD103+ CD8alpha dendritic cells (15–17) allowing the establishment of long-  
70 lasting antitumor CD8 T cell responses in murine models (18–21).

71

72 In this study, we tested the hypothesis that induction of host-CD8 T cell cross priming by allogeneic CAR  
73 iNKT cells would allow the establishment of an antitumor immunity lasting beyond the physical  
74 persistence of the transferred cells. Taking advantage of the immunoadjuvant role of iNKT cells and their  
75 lack of GvHD-inducing potential, we demonstrate that allogeneic CAR iNKT cells exert, in addition of

76 their previously reported direct antitumor effect (8–12), an indirect effect through the induction of host  
77 CD8 T cell cross-priming.

## 78 **Materials and Methods**

79

### 80 **Mice**

81 BALB/cJ (H-2K<sup>d</sup>) and FVB/NJ (H-2K<sup>q</sup>) mice were purchased from the Jackson Laboratory (Sacramento,  
82 CA). Firefly Luciferase (*Luc+*) transgenic FVB/N mice have been previously reported (22) and were bred  
83 in our animal facility at Stanford University. BALB/c Rag1<sup>-/-</sup>gamma-chain<sup>-/-</sup> and BALB/c BATF3<sup>-/-</sup> mouse  
84 strains were kind gifts of Dr. Irving Weissman and Dr. Samuel Strober respectively and were bred in our  
85 animal facility at Stanford University. All procedures performed on animals were approved by Stanford  
86 University's Institutional Animal Care and Use Committee and were in compliance with the guidelines of  
87 humane care of laboratory animals.

88

### 89 **CAR iNKT and conventional CAR T generation**

90 Murine CD19.28z CAR iNKT and conventional CAR T cells specifically recognizing the murine CD19  
91 molecule were generated using an adaptation of previously reported protocols (23). Murine CD19  
92 (mCD19) CAR stable producer cell line (24) was kindly provided by Dr. Terry J. Fry. iNKT cells were  
93 negatively enriched from FVB/N mouse spleen single-cell suspensions and using a mixture of  
94 biotinylated monoclonal antibodies (GR-1, clone: RB6-8C5; CD8a, clone: 53-6.7; CD19, clone: 6D5;  
95 TCR $\gamma\delta$ , clone: GL3; TER119/erythroid cell, clone: TER-119; CD62L, clone: MEL-14; BioLegend) and  
96 negative selection by anti-biotin microbeads (BD IMag™ Streptavidin Particles Plus DM, BD  
97 Biosciences). The enriched fraction (typically 10-30% enrichment) was then stimulated for 5 days with a  
98 synthetic analog of  $\alpha$ -galactosylceramide (KRN7000, 100 ng/ml, REGiMMUNE) in the presence of  
99 human IL-2 (100 UI/ml; NCI Repository) and human IL-15 (100 ng/ml; NCI Repository). Cells were  
100 grown in DMEM media supplemented with 10% heat-inactivated fetal bovine serum (FBS), 1 mmol/L  
101 sodium pyruvate, 2 mmol/L glutamine, 0.1 mmol/L nonessential amino acids, 100 U/mL penicillin, and  
102 100  $\mu$ g/mL streptomycin at 37°C with 5% CO<sub>2</sub>. Conventional T cells were enriched from FVB/N mouse  
103 spleen single-cell suspensions using the mouse Pan T Cell Isolation Kit II (Miltenyi Biotec) according to  
104 the manufacturer's protocol. T cells were activated for 24 hours with Dynabeads® Mouse T-Activator  
105 CD3/CD28 (Life Technologies, Grand Island, NY) in the presence of human IL-2 (30 U/ml) and murine  
106 IL-7 (10 ng/ml; PeproTech) in RPMI 1640 media supplemented with 10% heat-inactivated FBS, 1  
107 mmol/L sodium pyruvate, 2 mmol/L glutamine, 100 U/mL penicillin, and 100  $\mu$ g/mL streptomycin at  
108 37°C with 5% CO<sub>2</sub>. Activated cells were then transduced by culturing them for 48h in retronectin-coated  
109 plates loaded with supernatant harvested from the stable producer line 48h after culture. Invariant NKT  
110 cell purity was evaluated by flow cytometry using PE-conjugated PBS-57-loaded mCD1d tetramer (NIH  
111 Tetramer Facility) and TCR- $\beta$  (clone H57-597; BioLegend). Transduction efficacy was measured by flow

112 cytometry after protein L staining (25). Cell numbers were adjusted based on transduction efficacy (50%  
113 on average) before *in vitro* or *in vivo* use.

114

### 115 ***In vitro* cytotoxic assay**

116 Murine CD19.28z CAR iNKT cells were co-cultured with luciferase-transduced A20 cells  
117 (A20<sup>yfp+/luc+</sup>) (26) at different ratios adjusted based on transduction efficacy in culture medium consisting  
118 of RPMI 1640, supplemented with L-glutamine (2 mM), penicillin (100 U/mL), streptomycin (0.1  
119 mg/mL), 2-mercaptoethanol ( $5 \times 10^{-5}$  M), and 10% FBS. After 24 hours of culture, D-luciferin  
120 (PerkinElmer) was added at 5 µg/ml and incubated for 5 min before imaging using an IVIS Spectrum  
121 imaging system (Perkin Elmer). Data were analyzed with Living Image Software 4.1 (Perkin Elmer).

122

### 123 ***In vivo* bioluminescence imaging**

124 For *in vivo* bioluminescence imaging (BLI), mice were injected with D-luciferin (10 mg/kg;  
125 intraperitoneally) and anesthetized with isoflurane. Imaging was conducted using an IVIS Spectrum  
126 imaging system (Perkin Elmer) and data were analyzed with Living Image Software 4.1 (Perkin Elmer) or  
127 using an Ami LED-illumination based imaging system (Spectral Instruments Imaging, Tucson, AZ) and  
128 data analyzed with Aura Software (Spectral Instruments Imaging).

129

### 130 ***In vivo* murine tumor models**

131 We employed two systemic B-cell lymphoma mouse models previously reported (26). Briefly, CD19-  
132 expressing BCL<sub>1</sub><sup>luc+</sup> ( $5 \times 10^4$ ) or A20<sup>luc+</sup> cells ( $2 \times 10^4$ ) resuspended in PBS were injected  
133 intravenously (i.v.) by tail vein into alymphoid BALB/c (H-2K<sup>d</sup>) Rag1<sup>-/-</sup> gamma-chain<sup>-/-</sup> mice. For tumor  
134 induction in immunocompetent mice, tumor cells were injected i.v. into sublethally (4.4 Gy) irradiated  
135 BALB/c mice. For syngeneic bone marrow transplantation, BALB/c mice were lethally irradiated (8.8 Gy  
136 in 2 doses administered 4 hours apart) and transplanted with syngeneic BALB/c bone marrow cells ( $5 \times$   
137  $10^6$ ) after T-cell depletion using CD4 and CD8 MicroBeads (Miltenyi Biotec). For retransfer experiments,  
138 bone marrow cells from alymphoid BALB/c (H-2K<sup>d</sup>) Rag1<sup>-/-</sup> gamma-chain<sup>-/-</sup> mice were used to exclude  
139 any potential contribution from bone-marrow derived T or NK cells after reconstitution.

140

### 141 **Flow cytometry analysis**

142 *In vitro* cultured cells or *ex vivo* isolated cells were resuspended in phosphate-buffered saline (PBS)  
143 containing 2% FBS. Extracellular staining was preceded by incubation with purified FC blocking reagent  
144 (Miltenyi Biotec). Cells were stained with: TIM3 (clone: RMT3-23) APC, CD62L (clone: MEL-14)  
145 AF700, CD19 (clone: 6D5) APCFire750, CD44 (clone: IM7) PerCpCy5.5, PD-1 (clone: 29F.1A12)

146 BV605, CD8a (clone: 53-6.7) BV650, NK1.1 (clone: PK136) BV711, ICOS (clone: C398.4A) BV785,  
147 CD25 (clone: PC61.5) PE, TCR $\beta$  (clone: H57-597) PE/Dazzle594, and Thy1.1 (clone: HIS51) PeCy7. All  
148 antibodies were purchased from Biolegend. Dead cells were excluded using Fixable Viability Dye  
149 eFluor® 506 (eBioscience). Samples were acquired on a BD LSR II flow cytometer (BD Biosciences),  
150 and analysis was performed with FlowJo 10.5.0 software (Tree Star).

151

### 152 **RNA and TCR sequencing analysis**

153 Host CD4 and CD8 T cells were FACS-sorted from pooled spleens from 3 mice treated with allogeneic  
154 CAR iNKT or untreated control, frozen in TRIzol and conserved at -80°C. RNA was extracted using the  
155 TRIzol RNA isolation method (ThermoFisher Scientific) combined with the RNeasy MinElute Cleanup  
156 (Qiagen). Full-length cDNA was generated using the Clontech SMARTer v4 kit (Takara Bio USA, Inc.,  
157 Mountain View, CA) prior to library generation with the Nextera XT DNA Library Prep kit (Illumina,  
158 Inc., San Diego, CA). Libraries were pooled for sequencing on the Illumina HiSeq 4000 platform (75 bp,  
159 paired-end). Sequencing reads were checked using FastQC v.0.11.7. Estimated transcript counts and  
160 transcripts per million (TPM) for the mouse genome assembly GRCm38 (mm10) were obtained using the  
161 pseudo-aligner Kallisto. Transcript-level abundance was quantified and summarized into gene level using  
162 the tximport R package. Differential gene expression was performed using the DESeq2 R package version  
163 1.22.221, using FDR < 0.05. Gene-set enrichment analysis conducted using the fgsea R package. For  
164 TCR sequencing, libraries were prepared from the synthesized full-length cDNA using the nested PCR  
165 method previously reported (28, 29). Sequencing was performed by using the Illumina MiSeq platform  
166 after Illumina paired-end adapters incorporation. TCR $\beta$  sequence analysis was performed with VDJFasta.  
167 After total count normalisation, downstream analysis was performed on the 1000 most represented  
168 clonotypes across the samples using the FactoMineR and factoextra R packages.

169

### 170 **Statistical analysis**

171 The Mann–Whitney U test was used in cross-sectional analyses to determine statistical significance.  
172 Survival curves were represented with the Kaplan-Meier method and compared by log-rank test.  
173 Statistical analyses were performed using Prism 8 (GraphPad Software, La Jolla, CA) and R version 3.5.1  
174 (Comprehensive R Archive Network (CRAN) project (<http://cran.us.r-project.org>) with R studio version  
175 1.1.453.

176

177

178 **Results**

179

180 **Allogeneic CAR iNKT cell antitumor effect is significantly enhanced in the presence of host**  
181 **lymphocytes**

182 To study the interaction of allogeneic CD19-specific CAR iNKT cells with the host immune system, we  
183 utilized a fully murine experimental system and transduced murine iNKT cells expanded *ex vivo* from  
184 FVB/N mice with a previously reported CAR construct (23) composed of the variable region cloned from  
185 the 1D3 hybridoma recognizing murine CD19 linked to a portion of the murine CD28 molecule and to the  
186 cytoplasmic region of the murine CD3- $\zeta$  molecule (CD19.28z CAR; Figure 1A). The cytotoxic potential  
187 of CD19.28z-CAR iNKT was confirmed by *in vitro* cytotoxic assays against the CD19-expressing A20  
188 lymphoma cell line, revealing dose dependent cytotoxicity of the CD19.28z-CAR iNKT cells (Figure  
189 1B). As predicted, untransduced iNKT did not display any significant cytotoxic effect against A20 cells  
190 (Figure 1B) according to their lack of expression of CD1d. We next evaluated *in vivo* the direct antitumor  
191 effect of allogeneic CAR iNKT cells using BALB/c (H-2K<sup>d</sup>) Rag1<sup>-/-</sup> gamma-chain<sup>-/-</sup> mice as recipients  
192 (Figure 1C, F). FVB/N (H-2K<sup>q</sup>) derived allogeneic CAR iNKT cells significantly controlled tumor  
193 growth (Figure 1D) and improved animal survival (Figure 1E) compared to both untreated mice and mice  
194 receiving untransduced iNKT cells after administration to major histocompatibility complex (MHC)-  
195 mismatched immunodeficient mice receiving CD19-expressing BCL<sub>1</sub> B cell lymphoma cells. In a second,  
196 more aggressive model of B-cell lymphoma using A20 cells (Figure 1F), allogeneic CAR iNKT  
197 minimally affected tumor growth as revealed by BLI (Figure 1G) and slightly but significantly improved  
198 survival (Figure 1H) compared to untreated mice and mice treated with untransduced iNKT cells.

199

200 To assess the interplay between the transferred CAR iNKT cells and the host immune cells, we employed  
201 the A20 tumor model to test the antitumor activity mediated by allogeneic CAR iNKT cells in an  
202 immunocompetent model (Figure 2A) using as recipients wild-type BALB/c mice receiving sublethal  
203 irradiation (4.4 Gy) leading to a partial and transient lymphopenia. The antitumor effect of  $1 \times 10^6$   
204 allogeneic untransduced iNKT and CAR iNKT cells was greatly enhanced in this partially lymphopenic  
205 model, leading to long-term survival of all treated mice (Figure 2B). Interestingly, a dose as low as  $5 \times 10^4$   
206 untransduced iNKT cells (Figure 2C) was sufficient to significantly extend animal survival (Figure 2D)  
207 and the addition of the CAR further improved the effect of iNKT leading to long-term survival of all CAR  
208 iNKT treated mice (Figure 2D). To further stress the model, we tested the antitumor effect of  
209 untransduced iNKT and CAR iNKT cells in a high-burden, pre-established tumor model in which high  
210 numbers ( $2.5 \times 10^5$ ) of A20 cells were injected 7 days before the adoptive of the effector cells (Figure  
211 2F). In this model, untransduced iNKT displayed a minimal although statistically significant effect



212 (Figure 2F) while the administration of CAR iNKT cells significantly improved animal survival  
213 compared to both untreated mice and mice receiving untransduced iNKT cells (Figure 2F).

214 Collectively, these *in vitro* and *in vivo* data confirm the direct antitumor effect of murine CAR iNKT cells  
215 and revealed an improved effect of untransduced iNKT and, even more, of CAR iNKT cells in the  
216 presence of host lymphocytes.

217

### 218 **Host CD8 T cell cross-priming contributes to the indirect antitumor effect of allogenic CAR iNKT** 219 **cells**

220 The striking difference in allogenic CAR iNKT effect observed in mice with partial lymphopenia (Figure  
221 2B, D) compared to genetically alymphoid mice (Figure 1H) suggested a role for host-derived  
222 lymphocytes in the antitumor effect. To test the hypothesis that host CD8 T cell cross-priming mediates  
223 the indirect antitumor effect of allogenic CAR iNKT cells, we employed as recipients BALB/c BATF3<sup>-/-</sup>  
224 mice, in which CD8 T cell cross-priming is impaired as a result of the absence of BATF3-dependent  
225 CD103<sup>+</sup> CD8α<sup>+</sup> dendritic cells (30). The effect of allogenic CAR iNKT cells was partially  
226 abrogated in A20-receiving BATF3<sup>-/-</sup> mice as compared to WT mice (Figure 3A-B), supporting the  
227 hypothesis that the impact of allogenic CAR iNKT cells is mediated, at least partially, by the activation  
228 of host CD8 T cells via their cross-priming. To further assess the synergistic effect of allogenic CAR  
229 iNKT cells and host-derived CD8 T cells, we employed an autologous bone marrow transplantation  
230 model, co-administering allogenic FVB/N CAR iNKT with syngeneic BALB/c CD8 T cells at the time  
231 of transplantation with T-cell-depleted syngeneic BALB/c bone marrow cells and transfer of A20  
232 lymphoma cells into lethally irradiated (8.8 Gy) BALB/c recipients. Co-administration of allogenic CAR  
233 iNKT and autologous CD8 T cells resulted in a synergistic effect, significantly improving tumor control  
234 (Figure 3C) and animal survival (Figure 3D) compared to mice receiving no treatment, as well as to mice  
235 receiving either allogenic CAR iNKT or autologous CD8 T cells alone. Collectively these data indicate  
236 that CD8 T cell cross-priming is necessary for allogenic CAR iNKT cells to exert their full antitumor  
237 effect and suggest a synergy between these two cytotoxic T cell compartments.

238

### 239 **Allogenic CAR iNKT cell treatment modulates host CD8 T cells phenotype, transcriptome and** 240 **TCR repertoire.**

241 To gain further insights into the impact of CAR iNKT cells on host T cells, we performed phenotypic  
242 analysis of host T cells recovered at day 7 and 14 after treatment with allogenic CAR iNKT cells. At  
243 these timepoints, allogenic CAR iNKT cells had been already rejected as revealed by *in vivo* tracking by  
244 bioluminescence (Supplemental Figure 1A), flow cytometry (data not shown) and as suggested by the  
245 progressive increase of B cell numbers (Supplemental Figure 1B). We observed a significant increase in

246 the number of CD8 T cells recovered at day 7 and day 14 from the spleen of mice treated with CAR  
247 iNKT cells compared with untreated mice (Figure 4A). Immunophenotypic analysis revealed higher  
248 proportions of cells with a central memory (CD62L+ CD44+) and reduced proportions of cells with an  
249 effector (CD62L- CD44-) or effector memory (CD62L- CD44+) phenotype in CD8 T cells recovered at  
250 day 7 after allogeneic CAR iNKT treatment compared with untreated mice (Figure 4B). CD4 T cell  
251 numbers were increased at day 7 but not at day 14 after allogeneic CAR iNKT treatment (Supplemental  
252 Figure 2A), and CD4 T cell phenotype was only minimally affected by CAR iNKT treatment  
253 (Supplemental Figure 2B). A transcriptomic analysis performed on CD8 T cells FACS-sorted at day 14  
254 revealed the upregulation of genes associated with cytotoxic antitumor activity (*Lyz2*, *Gzma*, *Gzmm*, *Fasl*)  
255 and the downregulation of genes involved with responses to type I interferon (*Irf7*, *Ifit1*, *Ifi2712a*;  
256 Figure 4C). Gene Set Enrichment Analysis (GSEA) for Gene Ontology (GO) Biological Processes  
257 confirmed the upregulation of antitumor gene sets (Figure 4D) and the downregulation of the type I  
258 interferon signature. In agreement with our phenotypic results, a GSEA performed using two well-  
259 established memory CD8 T cell gene signatures revealed enrichment in CD8 T cell memory genes  
260 (Figure 4E-F). Transcriptomic analysis of CD4 T cells showed a similar downregulation of genes  
261 involved in responses to type I interferon (*Irf7*, *Ifit1*, *Ifit3*; Supplemental Figure 2C) but did not reveal any  
262 consistent pattern of expression of genes involved in antitumor activity or cellular differentiation  
263 (Supplemental Figure 2C). To assess the impact of CAR iNKT treatment on the TCR repertoire of CD8 T  
264 cells, we performed paired TCR-beta sequencing. Hierarchical clustering based on the 1000 most  
265 represented TCR clonotypes revealed a closer relationship between the TCR repertoire of CD8 T cells  
266 recovered from mice receiving CAR iNKT cells compared with CD8 T cells from untreated mice (Figure  
267 4G). Accordingly, principal component analysis (PCA) showed close similarity in the TCR repertoire of  
268 CD8 T cells from allogeneic CAR iNKT treated mice, while cells from untreated mice displayed high  
269 heterogeneity (Figure 4H). Analysis of the TCR repertoire of CD4 T cells did not reveal any impact of  
270 allogeneic CAR iNKT treatment (Supplemental Fig. 2D). Collectively, these results indicate that  
271 allogeneic CAR iNKT cell treatment shaped the host CD8 T cell compartment phenotypically,  
272 transcriptomically, and in terms of clonal repertoire.

273

#### 274 **Allogeneic CAR iNKT cell treatment induces long-lasting host CD8 T cell tumor-specific responses**

275 To formally prove that allogeneic CAR iNKT cells induce tumor-specific host immune responses, at day  
276 60 after treatment we recovered splenocytes from mice receiving A20 lymphoma cells and treated with  
277 allogeneic CAR iNKT cells. Recovered splenocytes were transferred into new lethally irradiated BALB/c  
278 recipients together with bone marrow from *Rag1*<sup>-/-</sup> gamma-chain<sup>-/-</sup> BALB/c mice and A20 cells (Figure  
279 5A). Unprimed splenocytes from mice receiving only sublethal irradiation were used as control.

280 Splenocytes primed in the presence of allogeneic CAR iNKT significantly extended the survival of mice  
281 compared to both untreated mice and mice receiving unprimed splenocytes (Figure 5B, left panel). To  
282 assess the contribution of CD8 T cells to this protective effect, we performed the same experiment  
283 retransferring only allogeneic CAR iNKT-primed or unprimed CD8 T cells. As shown in Figure 5B (right  
284 panel), host CD8 T cells from allogeneic CAR iNKT-treated mice significantly extended animal survival  
285 compared to both mice left untreated or receiving unprimed CD8 T cells. Collectively, these experiments  
286 formally demonstrate that allogeneic CAR iNKT treatment induced a long-lasting tumor-specific host  
287 CD8-dependent antitumor immunity in allogeneic recipients.

288

### 289 **Allogeneic CAR iNKT cells outperform conventional CAR T cells in the presence of host** 290 **lymphocytes**

291 To assess the advantage that this indirect antitumor effect could confer to allogeneic CAR iNKT cells  
292 over allogeneic conventional CAR T cells, we compared these two populations. Given the potent direct  
293 antitumor activity of conventional CAR T cells, a dose of as little as  $2.5 \times 10^5$  conventional CAR T cells  
294 was sufficient to significantly extend mouse survival when administered into alymphoid animals  
295 (Supplemental Figure 3), and this dose was selected for comparison to CAR iNKT cells. As shown in  
296 Figure 6A-B, during partial lymphopenia conventional CAR T cells significantly extended animal  
297 survival, while CAR iNKT cells dramatically outperformed conventional CAR T cells leading to tumor  
298 control and survival of all treated mice. Collectively, these results demonstrate that allogeneic CAR iNKT  
299 cells were significantly more effective than allogeneic conventional CAR T cells in inducing extended  
300 tumor control in immunocompetent hosts.

301

302

303

304 **Discussion**

305

306 In the present study, we demonstrated in a murine model of CD19+ lymphoma that allogeneic CAR iNKT  
307 cells exert, in addition to their previously reported direct antitumor effect, an even stronger indirect  
308 antitumor effect mediated by the induction of host immunity.

309

310 The potential contribution of the host immune system in the effect of CAR T cells has been shown in  
311 preclinical (31–35) and clinical (36, 37) studies. In particular, Beatty et al. showed that transiently  
312 expressed mRNA CARs were able to induce epitope spreading despite their limited persistence (36). We  
313 hypothesized that induction of bystander antitumor responses might be a particularly interesting approach  
314 in the allogeneic setting, as CAR cells administered across major-MHC barriers will be invariably  
315 rejected by the host immune system. After confirming in a fully murine model the previously reported  
316 direct cytotoxic effect of CAR iNKT cells (8–12), we demonstrate that allogeneic CAR iNKT cells  
317 efficiently induce anti-tumor immune responses in the recipient through host CD8 T cell cross-priming.  
318 Importantly, our phenotypic and transcriptomic data indicate that host CD8 T cells primed in the presence  
319 of allogeneic CAR iNKT display a central memory profile and we provide evidence that retransfer of  
320 CAR iNKT primed CD8 T cells allow for the transfer of protective antitumor immunity. These results  
321 suggest that the antitumor effect lasts much longer than the physical persistence of the administered  
322 allogeneic cells.

323

324 iNKT cells are an ideal platform for off-the-shelf immunotherapies given their lack of GvHD-induction  
325 potential (38) without need for deletion of their endogenous TCR, a manipulation that has been recently  
326 shown to alter the CAR T cell homeostasis and persistence (39). Moreover, despite being a rare  
327 lymphocyte population, iNKT cells can be easily expanded *ex vivo* to numbers needed for clinical uses  
328 (40–43) and several clinical trials using *ex vivo* expanded autologous iNKT cells have been already  
329 successfully conducted (44–46). However, previous reports indicate that the ability of iNKT cells to  
330 expand *in vitro* may vary widely among individuals(47), a potential limitation for generation of  
331 autologous or allogeneic MHC-matched products. Use of allogeneic, off-the-shelf iNKT cells to be  
332 administered across MHC barriers will circumvent this potential limitation as universal donors whose  
333 iNKT cells display optimal expansion potential can be selected. Moreover, our results indicate that  
334 extremely low numbers of CAR iNKT cells persisting for a very limited time are able to induce a potent,  
335 long-lasting antitumor effect through their immunomodulatory role. Such an effect is in accordance with  
336 what we previously reported in the GvHD settings, where similarly low numbers ( $5 \times 10^4$ ) of CD4+  
337 iNKT cells were able to efficiently prevent GvHD induced by conventional T cells in a major MHC-

338 mismatch mouse model of bone marrow transplantation (48), even when rapidly rejected third-party cells  
339 were employed (49).

340 A phase I clinical trial employing CD19-specific allogeneic CAR iNKT cells for patients with relapsed or  
341 refractory B-cell malignancies is currently ongoing (ANCHOR; NCT03774654). In analogy to what  
342 performed with conventional CAR T cell, this clinical trial involves the administration of a  
343 lymphodepleting regimen containing fludarabine and cyclophosphamide before CAR iNKT cell infusion.  
344 Our results indicate that a major component of allogeneic CAR iNKT cells effect derives from their  
345 interplay with the host immune system, an interaction that can significantly be impaired by the  
346 lymphodepleting conditioning. Future studies will determine whether the conventional  
347 fludarabine/cyclophosphamide lymphodepletion interferes with CAR iNKT cell effect and will test  
348 alternative regimens to optimize both the homeostasis and the immunoadjuvant effect of the administered  
349 product.

350

351 In conclusion, our results represent the first demonstration of an immunoadjuvant effect exerted by an  
352 allogeneic CAR cell product toward the host immune system, resulting in long-lasting antitumor effects  
353 that go beyond the physical persistence of the allogeneic cells.

354

355 **Funding**

356 This work was supported from funding from the R01 CA23158201 (RSN), P01 CA49605 (RSN), the  
357 Parker Institute for Cancer Immunotherapy (RSN), an American Society for Blood and Marrow  
358 Transplantation New Investigator Award 2018 (FS), the Geneva University Hospitals Fellowship (FS),  
359 the Swiss Cancer League BIL KLS 3806-02-2016 (FS), the Fondation de Bienfaisance Valeria Rossi di  
360 Montelera Eugenio Litta Fellowship (FS), the Dubois-Ferrière-Dinu-Lipatti Foundation (FS), the Virginia  
361 and D.K. Ludwig Fund for Cancer Research (CLM), and a St Baldrick's/Stand Up 2 Cancer Pediatric  
362 Dream Team Translational Cancer Research Grant (CLM). Stand Up 2 Cancer is a program of the  
363 Entertainment Industry Foundation administered by the American Association for Cancer Research. CLM  
364 is a member of the Parker Institute for Cancer Immunotherapy, which supports the Stanford University  
365 Cancer Immunotherapy Program. Flow cytometry analysis and sorting were performed on instruments in  
366 the Stanford Shared FACS Facility purchased using a NIH S10 Shared Instrumentation Grant  
367 (S10RR027431-01). Sequencing was performed on instruments in the Stanford Functional Genomics  
368 Facility, including the Illumina HiSeq 4000 purchased using a NIH S10 Shared Instrumentation Grant  
369 (S10OD018220).

370

371 **Author contributions**

372 FS conceived and designed research studies, developed methodology, conducted experiments, acquired  
373 and analyzed data, and wrote the manuscript; JKL, TH, KMB, MA, ASW conducted experiments; XJ,  
374 developed methodology and analyzed data; JB, AA, SH developed methodology and provided essential  
375 reagents; CLM provided essential reagents and intellectual input; RSN provided overall guidance and  
376 wrote the manuscript.

377

378 **Competing interests**

379 CLM holds several patent applications in the area of CAR T cell immunotherapy, is a founder of, holds  
380 equity in, and receives consulting fees from Lyell Immunopharma, has received consulting fees from  
381 NeoImmune Tech, Nektar Therapeutics and Apricity Health and royalties from Juno Therapeutics for the  
382 CD22-CAR. RSN receives consulting fees from KUUR Therapeutics. SH is currently a Kite Pharma  
383 employee. All other authors have declared that no conflict of interest exists.

384

385 **Data and materials availability**

386 Sequencing datasets will be made publicly available upon acceptance and prior to final publication.

387



389 **References**

- 390 1. Poirot L et al. Multiplex Genome-Edited T-cell Manufacturing Platform for “Off-the-Shelf” Adoptive  
391 T-cell Immunotherapies. *Cancer Res.* 2015;75(18):3853–3864.
- 392 2. Eyquem J et al. Targeting a CAR to the TRAC locus with CRISPR/Cas9 enhances tumour rejection.  
393 *Nature* 2017;543(7643):113–117.
- 394 3. MacLeod DT et al. Integration of a CD19 CAR into the TCR Alpha Chain Locus Streamlines  
395 Production of Allogeneic Gene-Edited CAR T Cells. *Mol. Ther.* 2017;25(4):949–961.
- 396 4. Wiebking V et al. Genome editing of donor-derived T-cells to generate allogenic chimeric antigen  
397 receptor-modified T cells: Optimizing  $\alpha\beta$  T cell-depleted haploidentical hematopoietic stem cell  
398 transplantation. *Haematologica* [published online ahead of print: April 2, 2020];  
399 doi:10.3324/haematol.2019.233882
- 400 5. Torikai H et al. Toward eliminating HLA class I expression to generate universal cells from allogeneic  
401 donors. *Blood* 2013;122(8):1341–1349.
- 402 6. Mavers M, Maas-Bauer K, Negrin RS. Invariant Natural Killer T Cells As Suppressors of Graft-versus-  
403 Host Disease in Allogeneic Hematopoietic Stem Cell Transplantation. *Front Immunol* 2017;8:900.
- 404 7. Wingender G, Krebs P, Beutler B, Kronenberg M. Antigen-specific cytotoxicity by invariant NKT cells  
405 in vivo is CD95/CD178-dependent and is correlated with antigenic potency. *J. Immunol.*  
406 2010;185(5):2721–2729.
- 407 8. Heczey A et al. Invariant NKT cells with chimeric antigen receptor provide a novel platform for safe  
408 and effective cancer immunotherapy. *Blood* 2014;124(18):2824–2833.
- 409 9. Tian G et al. CD62L+ NKT cells have prolonged persistence and antitumor activity in vivo. *J. Clin.*  
410 *Invest.* 2016;126(6):2341–2355.
- 411 10. Ngai H et al. IL-21 Selectively Protects CD62L+ NKT Cells and Enhances Their Effector Functions  
412 for Adoptive Immunotherapy. *J. Immunol.* 2018;201(7):2141–2153.
- 413 11. Rotolo A et al. Enhanced Anti-lymphoma Activity of CAR19-iNKT Cells Underpinned by Dual  
414 CD19 and CD1d Targeting. *Cancer Cell* 2018;34(4):596-610.e11.
- 415 12. Xu X et al. NKT Cells Coexpressing a GD2-Specific Chimeric Antigen Receptor and IL15 Show  
416 Enhanced In Vivo Persistence and Antitumor Activity against Neuroblastoma. *Clin. Cancer Res.*  
417 2019;25(23):7126–7138.
- 418 13. Fujii S, Shimizu K, Smith C, Bonifaz L, Steinman RM. Activation of Natural Killer T Cells by  $\alpha$ -  
419 Galactosylceramide Rapidly Induces the Full Maturation of Dendritic Cells In Vivo and Thereby Acts as  
420 an Adjuvant for Combined CD4 and CD8 T Cell Immunity to a Coadministered Protein. *J Exp Med*  
421 2003;198(2):267–279.
- 422 14. Hermans IF et al. NKT Cells Enhance CD4+ and CD8+ T Cell Responses to Soluble Antigen In Vivo  
423 through Direct Interaction with Dendritic Cells. *The Journal of Immunology* 2003;171(10):5140–5147.



- 424 15. Farrand KJ et al. Langerin+CD8 $\alpha$ + Dendritic Cells Are Critical for Cross-Priming and IL-12  
425 Production in Response to Systemic Antigens [Internet]. *The Journal of Immunology* [published online  
426 ahead of print: November 18, 2009]; doi:10.4049/jimmunol.0902707
- 427 16. Semmling V et al. Alternative cross-priming through CCL17-CCR4-mediated attraction of CTLs  
428 toward NKT cell-licensed DCs. *Nature Immunology* 2010;11(4):313–320.
- 429 17. Valente M et al. Cross-talk between iNKT cells and CD8 T cells in the spleen requires the IL-  
430 4/CCL17 axis for the generation of short-lived effector cells. *PNAS* 2019;116(51):25816–25827.
- 431 18. Nishimura T et al. The interface between innate and acquired immunity: glycolipid antigen  
432 presentation by CD1d-expressing dendritic cells to NKT cells induces the differentiation of antigen-  
433 specific cytotoxic T lymphocytes. *Int Immunol* 2000;12(7):987–994.
- 434 19. Fujii S et al. NKT Cells as an Ideal Anti-Tumor Immunotherapeutic [Internet]. *Front. Immunol.*  
435 2013;4. doi:10.3389/fimmu.2013.00409
- 436 20. Dashtsoodol N et al. Natural Killer T Cell-Targeted Immunotherapy Mediating Long-term Memory  
437 Responses and Strong Antitumor Activity [Internet]. *Front. Immunol.* 2017;8.  
438 doi:10.3389/fimmu.2017.01206
- 439 21. Ghinnagow R et al. Co-delivery of the NKT agonist  $\alpha$ -galactosylceramide and tumor antigens to  
440 cross-priming dendritic cells breaks tolerance to self-antigens and promotes antitumor responses.  
441 *OncoImmunology* 2017;6(9):e1339855.
- 442 22. Beilhack A et al. In vivo analyses of early events in acute graft-versus-host disease reveal sequential  
443 infiltration of T-cell subsets. *Blood* 2005;106(3):1113–1122.
- 444 23. Kochenderfer JN, Yu Z, Frasheri D, Restifo NP, Rosenberg SA. Adoptive transfer of syngeneic T  
445 cells transduced with a chimeric antigen receptor that recognizes murine CD19 can eradicate lymphoma  
446 and normal B cells. *Blood* 2010;116(19):3875–3886.
- 447 24. Qin H et al. Murine pre-B-cell ALL induces T-cell dysfunction not fully reversed by introduction of a  
448 chimeric antigen receptor. *Blood* 2018;132(18):1899–1910.
- 449 25. Zheng Z, Chinnasamy N, Morgan RA. Protein L: a novel reagent for the detection of chimeric antigen  
450 receptor (CAR) expression by flow cytometry. *J Transl Med* 2012;10:29.
- 451 26. Edinger M et al. Revealing lymphoma growth and the efficacy of immune cell therapies using in vivo  
452 bioluminescence imaging. *Blood* 2003;101(2):640–648.
- 453 27. Bray NL, Pimentel H, Melsted P, Pachter L. Near-optimal probabilistic RNA-seq quantification. *Nat.*  
454 *Biotechnol.* 2016;34(5):525–527.
- 455 28. Han A, Glanville J, Hansmann L, Davis MM. Linking T-cell receptor sequence to functional  
456 phenotype at the single-cell level. *Nat. Biotechnol.* 2014;32(7):684–692.
- 457 29. Saligrama N et al. Opposing T cell responses in experimental autoimmune encephalomyelitis. *Nature*  
458 2019;572(7770):481–487.

- 459 30. Hildner K et al. Batf3 deficiency reveals a critical role for CD8alpha+ dendritic cells in cytotoxic T  
460 cell immunity. *Science* 2008;322(5904):1097–1100.
- 461 31. Wang L-CS et al. Targeting fibroblast activation protein in tumor stroma with chimeric antigen  
462 receptor T cells can inhibit tumor growth and augment host immunity without severe toxicity. *Cancer*  
463 *Immunol Res* 2014;2(2):154–166.
- 464 32. Sampson JH et al. EGFRvIII mCAR-modified T-cell therapy cures mice with established intracerebral  
465 glioma and generates host immunity against tumor-antigen loss. *Clin. Cancer Res.* 2014;20(4):972–984.
- 466 33. Kueberuwa G, Kalaitidou M, Cheadle E, Hawkins RE, Gilham DE. CD19 CAR T Cells Expressing  
467 IL-12 Eradicate Lymphoma in Fully Lymphoreplete Mice through Induction of Host Immunity. *Mol Ther*  
468 *Oncolytics* 2018;8:41–51.
- 469 34. Brossart P. The role of antigen-spreading in the efficacy of immunotherapies. *Clin. Cancer Res.*  
470 [published online ahead of print: May 1, 2020]; doi:10.1158/1078-0432.CCR-20-0305
- 471 35. Lai J et al. Adoptive cellular therapy with T cells expressing the dendritic cell growth factor Flt3L  
472 drives epitope spreading and antitumor immunity. *Nat. Immunol.* 2020;21(8):914–926.
- 473 36. Beatty GL et al. Mesothelin-specific chimeric antigen receptor mRNA-engineered T cells induce anti-  
474 tumor activity in solid malignancies. *Cancer Immunol Res* 2014;2(2):112–120.
- 475 37. Wang X et al. Quantitative characterization of T-cell repertoire alteration in Chinese patients with B-  
476 cell acute lymphocyte leukemia after CAR-T therapy. *Bone Marrow Transplant.* 2019;54(12):2072–2080.
- 477 38. Mavers M, Maas-Bauer K, Negrin RS. Invariant Natural Killer T Cells As Suppressors of Graft-  
478 versus-Host Disease in Allogeneic Hematopoietic Stem Cell Transplantation. *Front Immunol* 2017;8:900.
- 479 39. Stenger D et al. Endogenous TCR promotes in vivo persistence of CD19-CAR-T cells compared to a  
480 CRISPR/Cas9-mediated TCR knockout CAR. *Blood* [published online ahead of print: 01 2020];  
481 doi:10.1182/blood.2020005185
- 482 40. Exley MA et al. Selective activation, expansion, and monitoring of human iNKT cells with a  
483 monoclonal antibody specific for the TCR  $\alpha$ -chain CDR3 loop. *European Journal of Immunology*  
484 2008;38(6):1756–1766.
- 485 41. Chiba A et al. Rapid and reliable generation of invariant natural killer T-cell lines in vitro.  
486 *Immunology* 2009;128(3):324–333.
- 487 42. East JE, Sun W, Webb TJ. Artificial antigen presenting cell (aAPC) mediated activation and  
488 expansion of natural killer T cells. *J Vis Exp* [published online ahead of print: December 29, 2012];(70).  
489 doi:10.3791/4333
- 490 43. Mavers M et al. IL-2 Plus IL-15 Leads to Enhanced Ex Vivo Expansion of Human Invariant Natural  
491 Killer T Cells. *Biology of Blood and Marrow Transplantation* 2018;24(3):S208–S209.
- 492 44. Motohashi S et al. A Phase I Study of In vitro Expanded Natural Killer T Cells in Patients with  
493 Advanced and Recurrent Non–Small Cell Lung Cancer. *Clin Cancer Res* 2006;12(20):6079–6086.

- 494 45. Yamasaki K et al. Induction of NKT cell-specific immune responses in cancer tissues after NKT cell-  
495 targeted adoptive immunotherapy. *Clinical Immunology* 2011;138(3):255–265.
- 496 46. Exley MA et al. Adoptive Transfer of Invariant NKT Cells as Immunotherapy for Advanced  
497 Melanoma: A Phase I Clinical Trial. *Clin Cancer Res* 2017;23(14):3510–3519.
- 498 47. Rubio M-T et al. Pre-transplant donor CD4- invariant NKT cell expansion capacity predicts the  
499 occurrence of acute graft-versus-host disease. *Leukemia* 2017;31(4):903–912.
- 500 48. Schneidawind D et al. CD4+ invariant natural killer T cells protect from murine GVHD lethality  
501 through expansion of donor CD4+CD25+FoxP3+ regulatory T cells. *Blood* 2014;124(22):3320–3328.
- 502 49. Schneidawind D et al. Third-party CD4+ invariant natural killer T cells protect from murine GVHD  
503 lethality. *Blood* 2015;125(22):3491–3500.
- 504
- 505

506 **Figure Legends**

507

508 **Figure 1. *In vitro* and *in vivo* antitumor activity of murine CAR iNKT cells.** (A) Representative  
509 FACS-plot of untransduced (left panel) and mCD19.28z-transduced (right panel) murine CAR iNKT  
510 cells. iNKT were identified as PBS-57 CD1d tetramer positive cells and CAR transduction was quantified  
511 by Protein L staining. (B) Mean and SD of cytotoxicity relative to the untreated control at different E:T  
512 ratios. Results are representative of two independent experiments performed in triplicate. (C,F) Schematic  
513 representation of the BCL<sub>1</sub><sup>luc+</sup> (C) and A20<sup>luc+</sup> (F) into Rag1<sup>-/-</sup> gamma-chain<sup>-/-</sup> recipients experiments.  
514 (D,G) Representative *in vivo* bioluminescence (BLI) images of BCL<sub>1</sub><sup>luc+</sup> (D) and A20<sup>luc+</sup> (G) tumor cell  
515 progression in Rag1<sup>-/-</sup> gamma-chain<sup>-/-</sup> treated with untransduced iNKT cells (blue boxes and dots), CAR  
516 iNKT cells (red boxes and dots) or untreated (grey box and dots). (E,H) Survival of mice receiving  
517 BCL<sub>1</sub><sup>luc+</sup> (E) or A20<sup>luc+</sup> (H) and treated with untransduced iNKT cells (blue lines), CAR iNKT cells (red  
518 lines) or left untreated (NT, grey lines). Results are pooled from two independent experiments with a total  
519 of 6-9 mice per group. BLI results were compared using a nonparametric Mann–Whitney U test and p  
520 values are shown when significant. Survival curves were plotted using the Kaplan-Meier method and  
521 compared by log-rank test. P values are indicated when significant.

522

523 **Figure 2. Allogeneic CAR iNKT cell antitumor effect is greatly enhanced by the presence of host**  
524 **lymphocytes.** (A,C,E) Schematic representation of the experiments employing A20<sup>luc+</sup> cells into  
525 sublethally (4.4 Gy) irradiated WT BALB/c mice. (B,D,F) Survival of mice receiving A20<sup>luc+</sup> cells and  
526 treated with untransduced iNKT cells (blue lines), CAR iNKT cells (red lines) or left untreated (NT, grey  
527 lines). Results are pooled from two independent experiments with a total of 10-21 mice per group.  
528 Survival curves were plotted using the Kaplan-Meier method and compared by log-rank test. P values are  
529 indicated when significant.

530

531 **Figure 3. Indirect antitumor effect of allogeneic CAR iNKT cells is dependent on host CD8 T cells**  
532 **cross-priming.** Representative *in vivo* BLI images of A20<sup>luc+</sup> cell progression (A) and survival (B) of  
533 sublethally (4.4 Gy) irradiated WT or BATEF3<sup>-/-</sup> BALB/c mice treated or not with 10<sup>6</sup> CAR iNKT cells.  
534 Representative *in vivo* BLI images of A20<sup>luc+</sup> cell progression (C) and survival (D) of lethally (8.8 Gy)  
535 irradiated WT BALB/c mice transplanted with syngeneic BALB/c TCD-BM and treated with syngeneic  
536 CD8 T cells (4x10<sup>6</sup>; green symbols and line), CAR iNKT cells (10<sup>6</sup>; blue symbols and line) or both (red  
537 symbols and line). Untreated controls are depicted in grey. BLI results were compared using a  
538 nonparametric Mann–Whitney U test and p values are shown. Survival curves were plotted using the  
539 Kaplan-Meier method and compared by log-rank test. P values are indicated when significant.

540

541 **Figure 4. Allogeneic CAR iNKT cell treatment modulates host CD8 T cell number, phenotype,**  
542 **transcriptome, and TCR repertoire.** Number (A) and immunophenotype (B) of host CD8 T cells  
543 recovered from spleen 7 and 14 days after tumor induction in mice treated with allogeneic CAR iNKT  
544 cells (red boxes and symbols) or untreated (grey boxes and symbols). Results are pooled from two  
545 independent experiments with a total of 5-13 mice per group. Groups were compared using a  
546 nonparametric Mann–Whitney U test and p values are shown. (C) Heatmap representing differentially  
547 expressed genes in host CD8 T cells FACS-sorted from recipients treated or not with allogeneic CAR  
548 iNKT cells. Expression for each gene is scaled (z-scored) across single rows. Each column represents  
549 independent experiments with one to two biological replicates per experiment. (D) Top 10 enriched  
550 terms/pathways in CD8 T cells from untreated (grey bars) and CAR iNKT cell treated (red bars) animals  
551 revealed by GO Biological Process analysis using GSEA. (E-F) Enrichment plots displaying the  
552 distribution of the enrichment scores for the genes down-regulated during transition from naive CD8 T  
553 cells versus memory CD8 T cells according to the *Goldrath et al.* (E) or *Kaech et al.* (F) signatures. Gene  
554 signatures were obtained from Molecular Signatures Database (MSigDB; C7: immunologic signatures).  
555 (G) Hierarchical clustering and (H) principal component analysis (PCA) of the top 1000 clonotypes based  
556 on TCR $\beta$  sequencing of CD8 T cells from hosts treated with allogeneic CAR iNKT cells (red) or left  
557 untreated (grey).

558

559 **Figure 5. Allogeneic CAR iNKT cell-primed host CD8 T cells display long-lasting antitumor**  
560 **immunity.** (A) Schematic representation of the sequential adoptive transfer experiment. Host splenocytes  
561 or CD8 T cells were recovered after 60 days from sublethally irradiated BALB/c mice, injected with  
562 A20<sup>luc+</sup> cells, and treated with CAR iNKT cells (primed cells). Splenocytes or CD8 T cells recovered after  
563 60 days from sublethally irradiated BALB/c mice were used as controls (unprimed cells). Primed or  
564 unprimed host splenocytes ( $5 \times 10^6$  cells) were transferred, after lethal irradiation, to a new set of BALB/c  
565 mice receiving A20<sup>luc+</sup> cells together with bone marrow cells from syngeneic Rag1<sup>-/-</sup> gamma-chain<sup>-/-</sup>  
566 BALB/c mice. Alternatively, primed or unprimed host CD8 T cells ( $1 \times 10^6$  cells) were transferred. (B)  
567 Survival of transplanted mice receiving primed (red line) or unprimed (blue line) splenocytes (left panel)  
568 or CD8 T cells (right panel). Untreated controls are depicted in grey. Results are pooled from two  
569 independent experiments with a total of 10-14 mice per group. Survival curves were plotted using the  
570 Kaplan-Meier method and compared by log-rank test. P values are indicated when significant.

571

572 **Figure 6. Allogeneic CAR iNKT cells are more effective than allogeneic conventional CAR T cells.**  
573 Representative *in vivo* BLI images of A20<sup>luc+</sup> cells progression (A) and survival (B) of sublethally (4.4

574 Gy irradiated BALB/c mice treated with  $2.5 \times 10^5$  allogeneic CAR iNKT (red curve and symbols),  $2.5 \times 10^5$   
575 allogeneic conventional CAR T (green curve and symbols) cells or untreated (grey curve and symbols).  
576 Results are pooled from two independent experiments with a total of 10 mice per group. BLI results were  
577 compared using a nonparametric Mann–Whitney U test and p values are shown. Survival curves were  
578 plotted using the Kaplan-Meier method and compared by log-rank test. P values are indicated when  
579 significant.  
580

581 **Supplemental Figure Legends**

582

583 **Supplemental Figure 1. Limited persistence and absence of B-cell aplasia after allogeneic CAR**  
584 **iNKT cell treatment.** (A) Persistence of *Luc*<sup>+</sup> CAR iNKT cells in tumor bearing mice at different time  
585 points. BLI data are expressed as photon/sec in mice receiving  $1 \times 10^6$  *Luc*<sup>+</sup> CAR iNKT cells after  
586 subtracting the background detected in mice not receiving *Luc*<sup>+</sup> cells. Data shown are from two merged  
587 independent experiments with 5 mice per group in each experiment. (B) B cell numbers. B cells were  
588 defined by FACS as CD19<sup>+</sup> YFP<sup>-</sup> to distinguish normal B cells from CD19<sup>+</sup> YFP<sup>+</sup> A20 cells. Median  
589 (black dashed line) and upper/lower range (gray dotted lines) of B cell counts in naive mice are  
590 represented.

591

592 **Supplemental Figure 2. Limited impact of allogeneic CAR iNKT cell treatment on host CD4 T cells.**  
593 Number (A) and immunophenotype (B) of host CD4 T cells recovered from spleen 7 and 14 days after  
594 tumor induction in mice treated with allogeneic CAR iNKT cells (red boxes and symbols) or untreated  
595 (grey boxes and symbols). Results are pooled from two independent experiments with a total of 5-13 mice  
596 per group. Groups were compared using a nonparametric Mann–Whitney U test and p values are shown.  
597 (C) Heatmap representing differentially expressed genes in host CD4 T cells FACS-sorted from recipients  
598 treated or not with allogeneic CAR iNKT cells. Expression for each gene is scaled (z-scored) across  
599 single rows. (D) Principal component analysis (PCA) of the top 1000 clonotypes based on TCR $\beta$   
600 sequencing of CD4 T cells from hosts treated with allogeneic CAR iNKT cells (red) or left untreated  
601 (grey).

602

603 **Supplemental Figure 3. Direct antitumor effect of conventional CAR T cells in alymphoid mice.**  
604 Survival of alymphoid BALB/c Rag1<sup>-/-</sup> gamma-chain<sup>-/-</sup> mice receiving  $2.5 \times 10^5$  (solid green lines),  $5 \times 10^4$   
605 (dashed green lines) allogeneic conventional CAR T cells or untreated (NT, grey lines). Results are  
606 pooled from two independent experiments with a total of 6-8 mice per group. Survival curves were  
607 plotted using the Kaplan-Meier method and compared by log-rank test.

# FIGURE 1

bioRxiv preprint doi: <https://doi.org/10.1101/2021.02.03.428987>; this version posted February 3, 2021. The copyright holder for this preprint (which was not certified by peer review) is the author/funder. This article is a US Government work. It is not subject to copyright under 17 USC 105 and is also made available for use under a CC0 license.

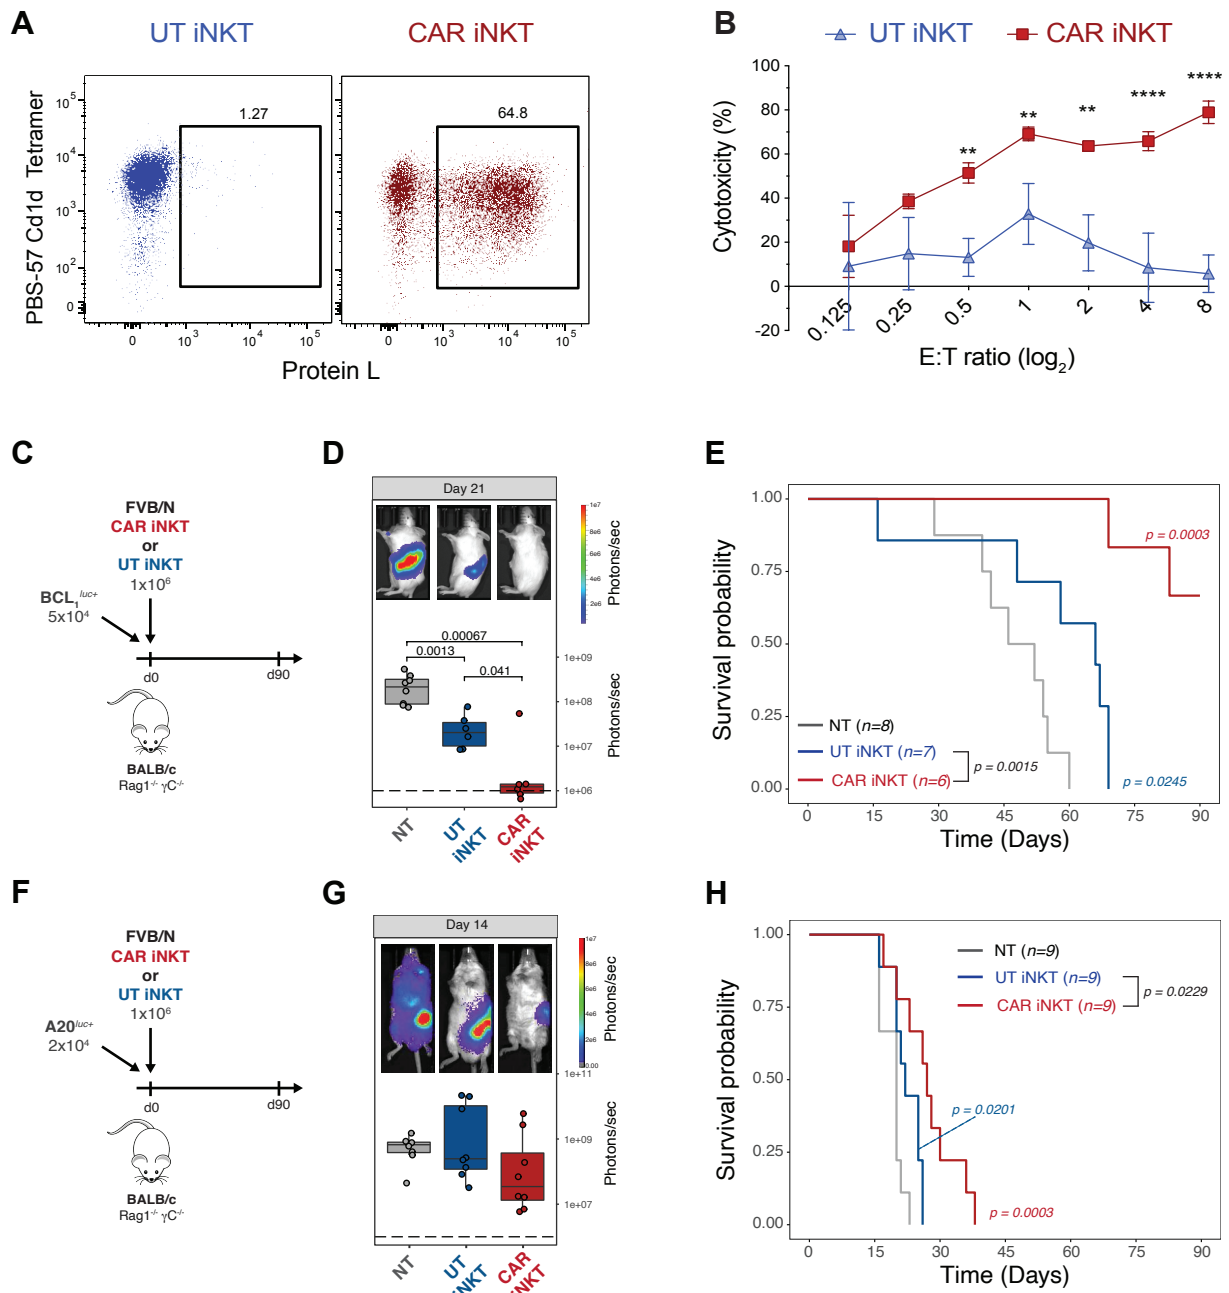



## FIGURE 2

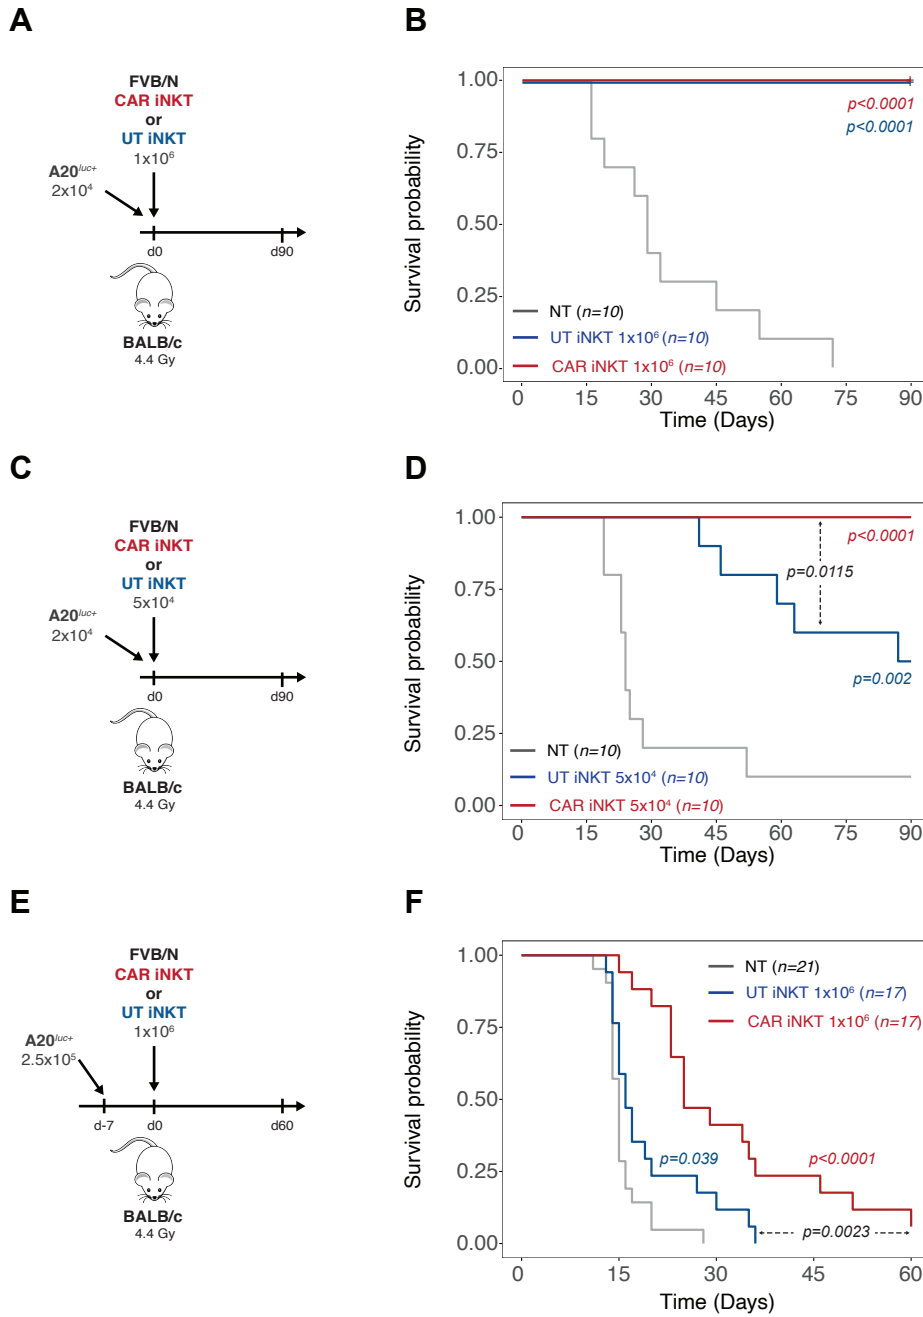

# FIGURE 3

bioRxiv preprint doi: <https://doi.org/10.1101/2021.02.03.428987>; this version posted February 3, 2021. The copyright holder for this preprint (which was not certified by peer review) is the author/funder. This article is a US Government work. It is not subject to copyright under 17 USC 105 and is also made available for use under a CC0 license.

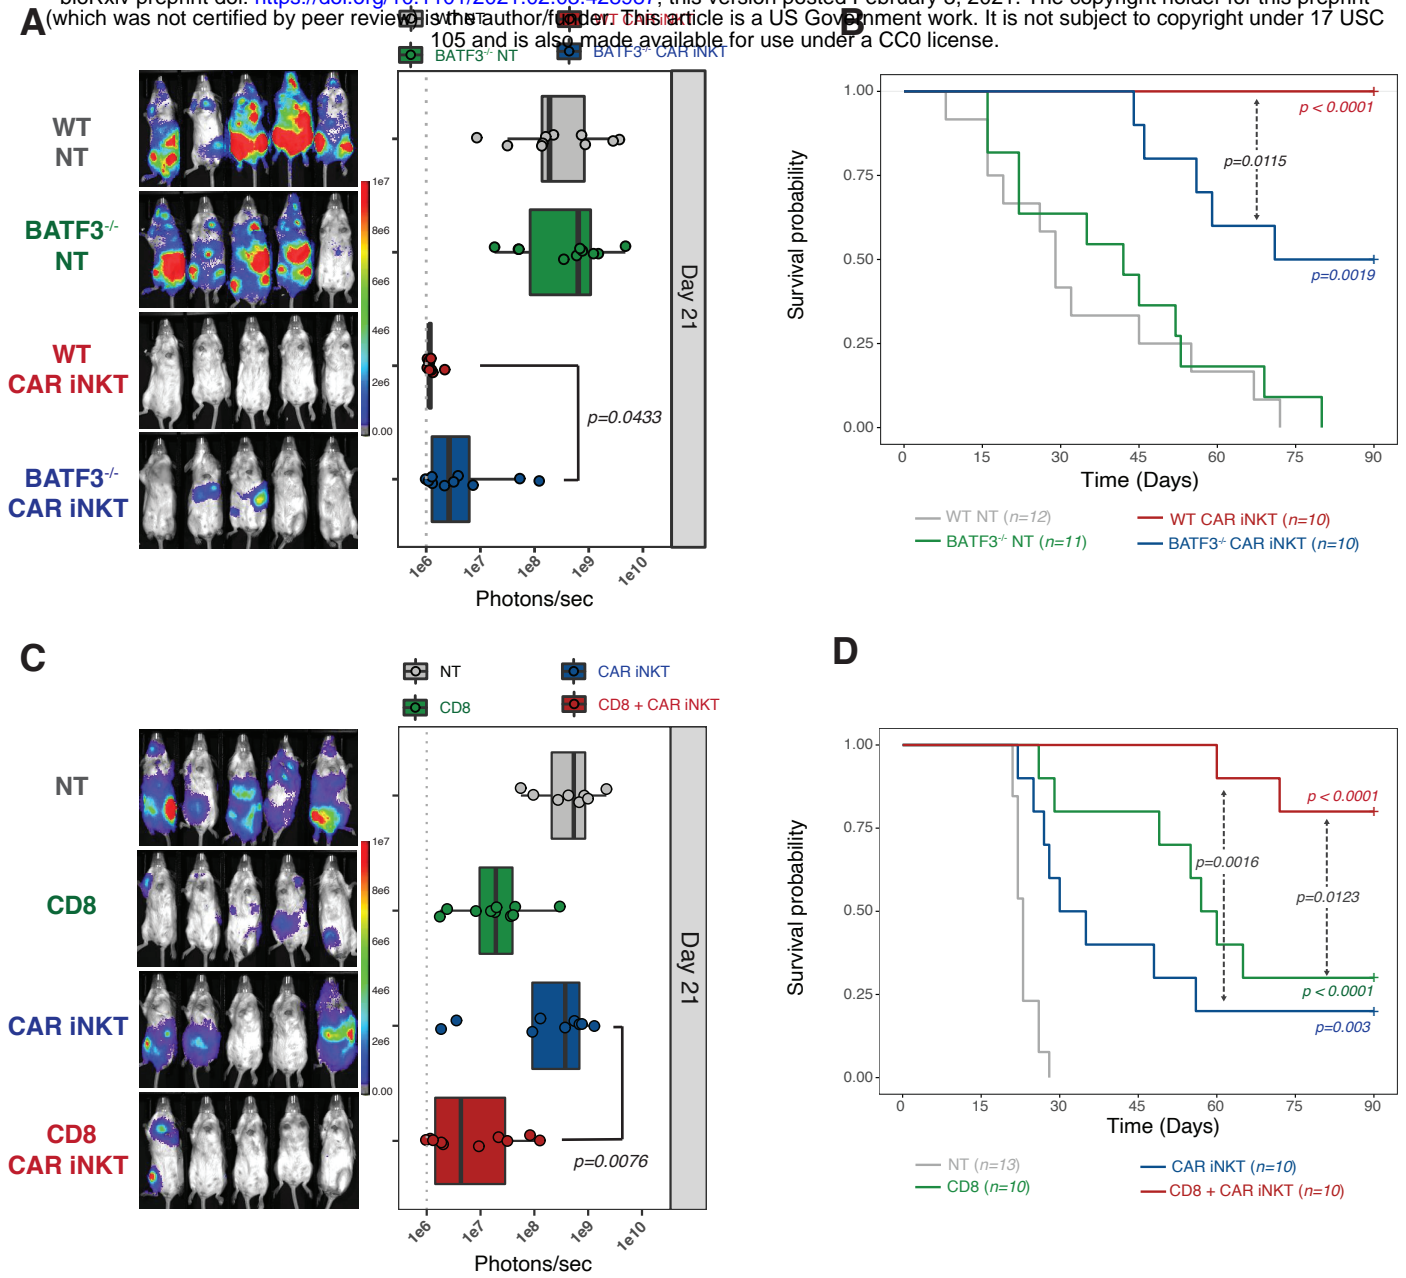

# FIGURE 4

bioRxiv preprint doi: <https://doi.org/10.1101/2021.02.03.428987>; this version posted February 3, 2021. The copyright holder for this preprint (which was not certified by peer review) is the author/funder. This article is a US Government work. It is not subject to copyright under 17 USC 105 and is also made available for use under a CC0 license.

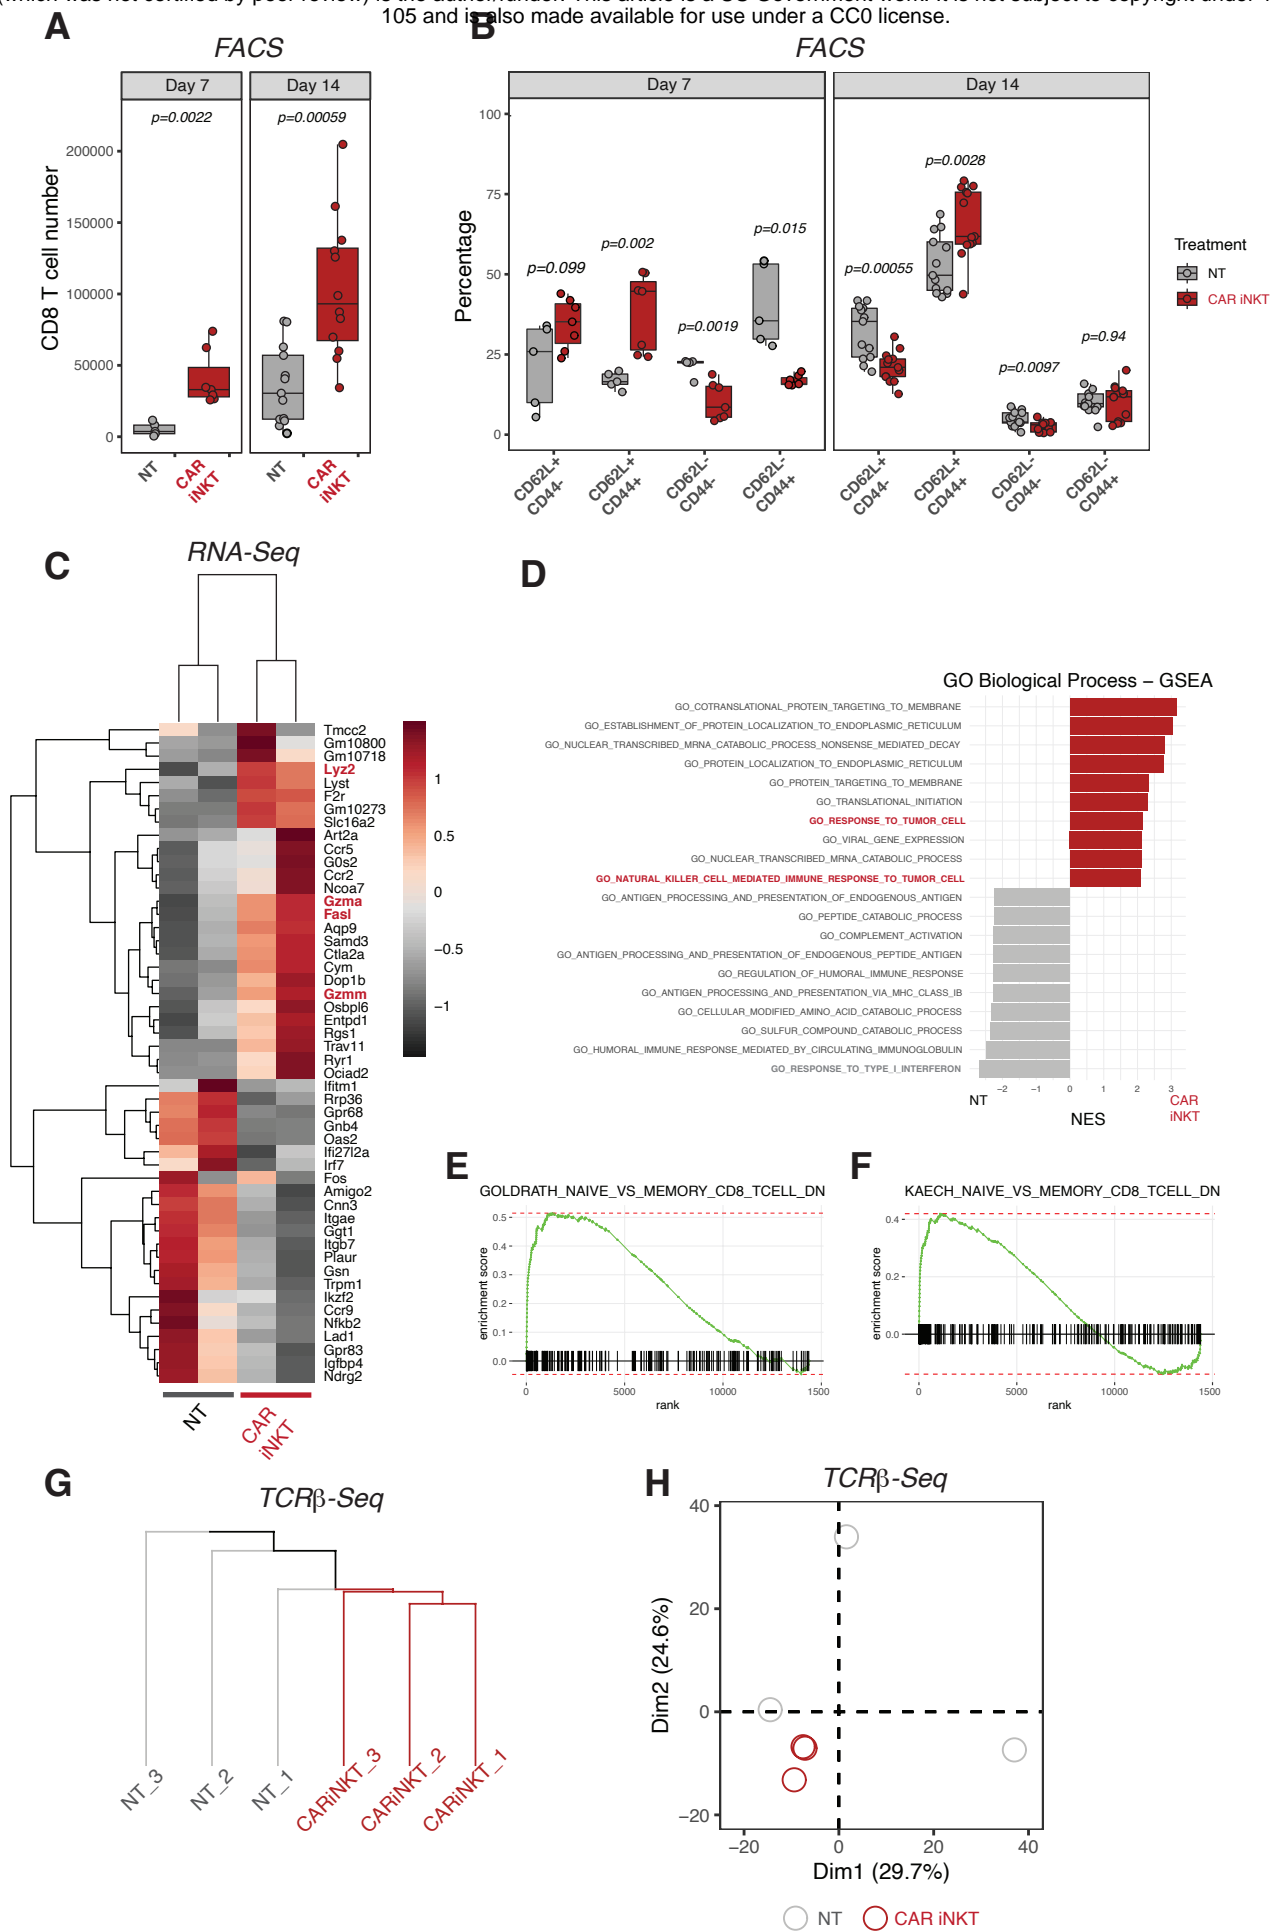

# FIGURE 5

bioRxiv preprint doi: <https://doi.org/10.1101/2021.02.03.428987>; this version posted February 3, 2021. The copyright holder for this preprint (which was not certified by peer review) is the author/funder. This article is a US Government work. It is not subject to copyright under 17 USC 105 and is also made available for use under a CC0 license.

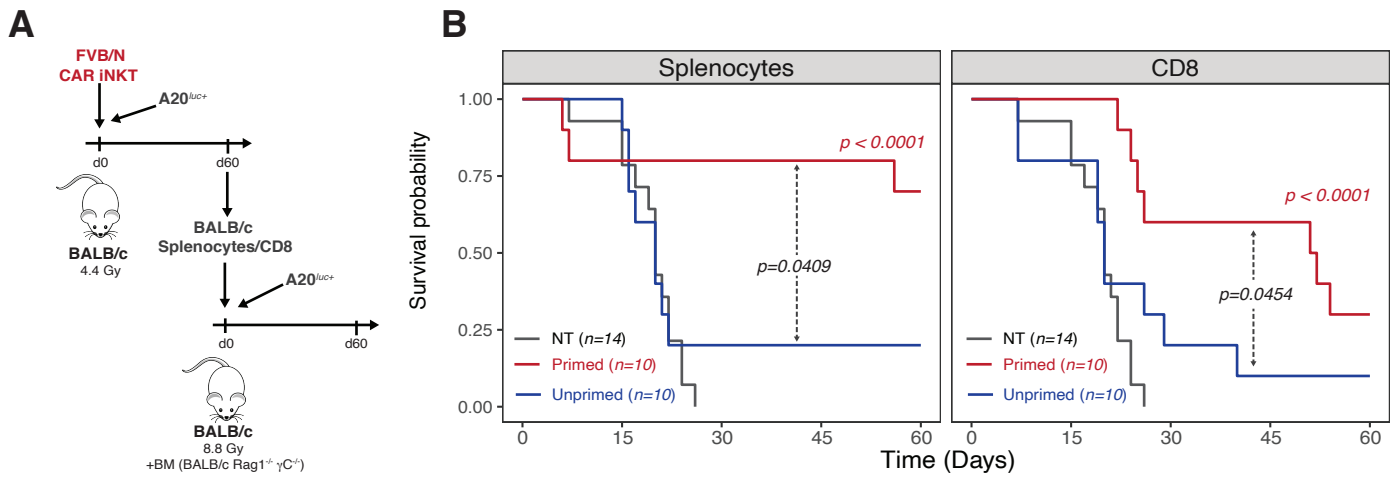

# FIGURE 6

bioRxiv preprint doi: <https://doi.org/10.1101/2021.02.03.428987>; this version posted February 3, 2021. The copyright holder for this preprint (which was not certified by peer review) is the author/funder. This article is a US Government work. It is not subject to copyright under 17 USC 105 and is also made available for use under a CC0 license.

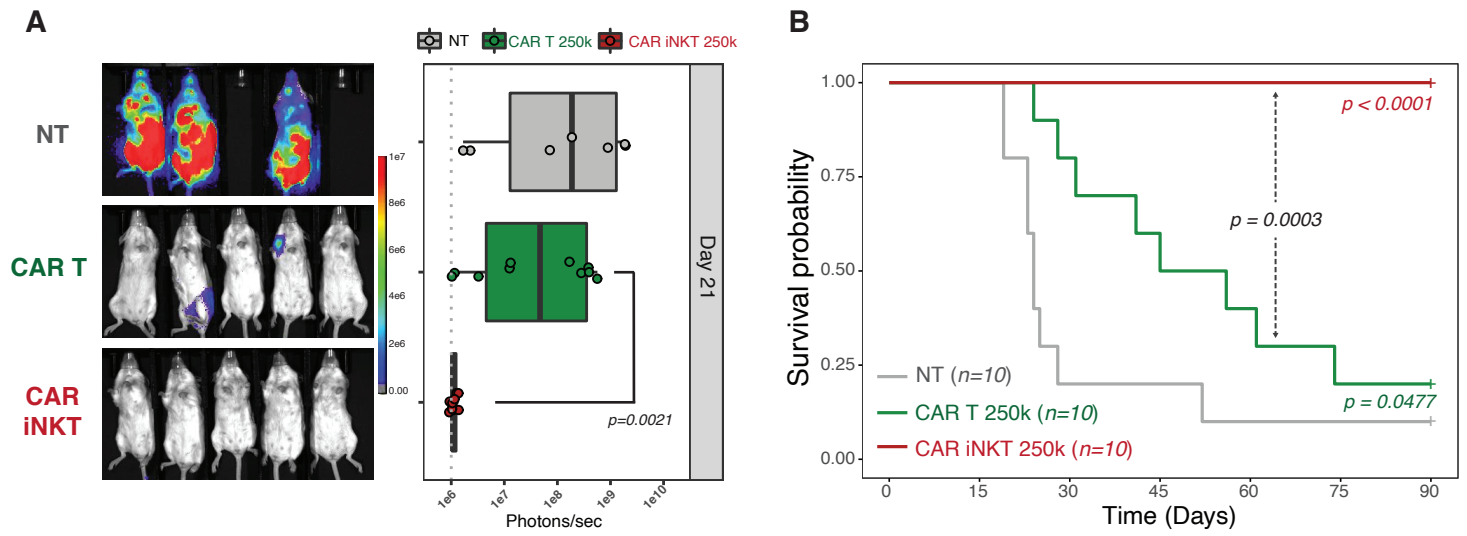

Source: https://www.biorxiv.org/content/10.1101/2021.02.03.428987v1.full.pdf
